# Supplementary material
Source: Springer Nature journal article supplement (https://www.springermedizin.de/resource/supplementary/12873_2010_110_MOESM4_ESM.pdf/9431442)

**AKUTT**

**Immediate**

**AKUTT**

**Immediate**

**AKUTT**

**HASTER**

**Urgent**

**HASTER**

**Urgent**

**HASTER**

**VANLIG**

**Delayed**

**VANLIG**

**Delayed**

**VANLIG**

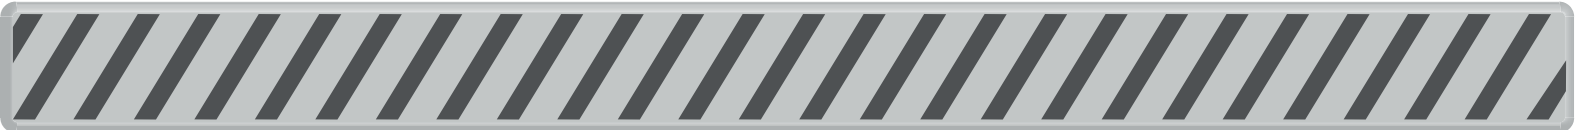

Supplement: MOESM4 [file 9431442]
